# Supplementary material
Source: PubMed Central journal article supplement (PMC4293301)
Supplement: NIHMS631335-supplement-11060_2014_1618_MOESM1_ESM.pdf [file NIHMS631335-supplement-11060_2014_1618_MOESM1_ESM.pdf]

**Online Resource 1a. *EPHA* mRNA Expression,  
SHH vs. Non-SHH MB (Group 3 and 4)**

| <b>Tumor histology</b>          | <b>Sample type</b> | <b>Pt. age</b> | <b>Pt. status</b> | <b>Sub-group</b> | <b><i>EPH</i><br/>A2</b> | <b><i>EPH</i><br/>A3</b> | <b><i>EPH</i><br/>A4</b> | <b><i>EPH</i><br/>A5</b> | <b><i>EPH</i><br/>A7</b> | <b><i>EPH</i><br/>A8</b> | <b><i>EPHA</i><br/>10</b> |
|---------------------------------|--------------------|----------------|-------------------|------------------|--------------------------|--------------------------|--------------------------|--------------------------|--------------------------|--------------------------|---------------------------|
| Desmoplastic                    | Diagnostic         | 1 y            | deceased          | SHH              | ND                       | 325                      | 47                       | 15                       | 227                      | ND                       | ND                        |
| Desmoplastic                    | Diagnostic         | 2 y            | alive             | SHH              | ND                       | 119                      | 23                       | 7                        | 423                      | ND                       | 32                        |
| Desmoplastic, M+                | Diagnostic         | 5 y            | alive             | SHH              | ND                       | 25                       | 84                       | 29                       | 264                      | ND                       | ND                        |
| MBEN                            | Diagnostic         | 1 y            | deceased          | SHH              | ND                       | 128                      | 143                      | 63                       | 379                      | 56                       | 18                        |
| Anaplastic                      | Post-Rx            | 3 y            | deceased          | SHH              | 119                      | 29                       | 516                      | 11                       | 52                       | ND                       | ND                        |
| Classic                         | Diagnostic         | 9 m            | alive             | SHH              | ND                       | 652                      | 45                       | ND                       | 36                       | ND                       | 24                        |
| Classic,                        | Diagnostic         | 2 y            | deceased          | SHH              | ND                       | 116                      | 85                       | 7                        | 203                      | ND                       | 15                        |
| Classic                         | Post-Rx            | 2 y            | deceased          | SHH              | ND                       | 177                      | 23                       | 72                       | 520                      | ND                       | 16                        |
| Classic                         | Diagnostic         | 4 y            | alive             | SHH              | ND                       | 265                      | 252                      | ND                       | 223                      | 27                       | ND                        |
| Classic                         | Diagnostic         | 5 y            | alive             | SHH              | ND                       | 38                       | 16                       | ND                       | 111                      | 34                       | 32                        |
| Classic, M+                     | Post-Rx            | 7 y            | deceased          | SHH              | 159                      | 229                      | 96                       | 19                       | 72                       | 117                      | ND                        |
| <b>Mean expression SHH:</b>     |                    |                |                   |                  | 139                      | 191                      | 121                      | 27                       | 228                      | 58                       | 23                        |
| <b>% positive SHH:</b>          |                    |                |                   |                  | 18                       | 100                      | 100                      | 73                       | 100                      | 36                       | 54                        |
| Anaplastic                      | Diagnostic         | 3 y            | alive             | 3                | 95                       | 161                      | 473                      | 26                       | 78                       | 264                      | 112                       |
| Anaplastic                      | Diagnostic         | 2 y            | alive             | 4                | 661                      | 18                       | 47                       | ND                       | 99                       | 736                      | 82                        |
| Anaplastic                      | Diagnostic         | 6 y            | alive             | 4                | 214                      | 11                       | 43                       | 25                       | 268                      | 204                      | 63                        |
| Classic                         | Diagnostic         | 6 m            | alive             | 4                | ND                       | 73                       | 211                      | ND                       | ND                       | 134                      | ND                        |
| Classic                         | Diagnostic         | 1 y            | alive             | 3                | 430                      | 91                       | 167                      | ND                       | 466                      | 343                      | 39                        |
| Classic                         | Diagnostic         | 2 y            | alive             | 4                | 360                      | 159                      | 132                      | ND                       | 101                      | 569                      | 17                        |
| Classic                         | Diagnostic         | 2 y            | alive             | 3                | 60                       | 61                       | 57                       | 215                      | 91                       | 335                      | 150                       |
| Classic, M+                     | Diagnostic         | 2 y            | alive             | 3                | 71                       | 172                      | 1173                     | 42                       | 1610                     | 32                       | 52                        |
| Classic                         | Diagnostic         | 3 y            | alive             | 4                | 228                      | 1292                     | 86                       | ND                       | 502                      | 445                      | 29                        |
| Classic, M+                     | Diagnostic         | 5 y            | deceased          | 3                | 239                      | 464                      | 881                      | 14                       | 419                      | 451                      | 50                        |
| Classic, M+                     | Diagnostic         | 6 y            | deceased          | 4                | 50                       | 1564                     | 79                       | 114                      | 40                       | 390                      | 29                        |
| Classic                         | Diagnostic         | 6 y            | alive             | 4                | ND                       | 31                       | 44                       | ND                       | 43                       | 237                      | 24                        |
| Classic, M+                     | Diagnostic         | 8 y            | deceased          | 4                | ND                       | 126                      | 1117                     | 207                      | 83                       | 250                      | ND                        |
| Classic                         | Diagnostic         | 11 y           | alive             | 3                | 236                      | 31                       | 238                      | 19                       | 355                      | 212                      | 38                        |
| Classic                         | Diagnostic         | 11 y           | alive             | 4                | ND                       | 1492                     | 93                       | 57                       | ND                       | 329                      | 21                        |
| Classic                         | Diagnostic         | 11 y           | alive             | 3                | ND                       | 85                       | 116                      | 40                       | 68                       | 114                      | ND                        |
| Classic                         | Diagnostic         | 12 y           | alive             | 4                | 225                      | 579                      | 404                      | 19                       | 51                       | 914                      | 53                        |
| Classic                         | Diagnostic         | 16 y           | alive             | 4                | 437                      | 29                       | 36                       | ND                       | ND                       | 57                       | 27                        |
| <b>Mean expression non-SHH:</b> |                    |                |                   |                  | 254                      | 358                      | 300                      | 71                       | 285                      | 334                      | 52                        |
| <b>% positive non-SHH:</b>      |                    |                |                   |                  | 72                       | 100                      | 100                      | 61                       | 83                       | 100                      | 83                        |
| <b>Overall mean expression:</b> |                    |                |                   |                  | 238                      | 295                      | 232                      | 34                       | 260                      | 294                      | 44                        |
| <b>Overall % positive:</b>      |                    |                |                   |                  | 52                       | 100                      | 100                      | 66                       | 90                       | 100                      | 72                        |

**Online Resource 1b. *EPHA* mRNA Expression,  
Desmoplastic vs. Non-Desmoplastic SHH MB**

| <b>Tumor histology</b>                       | <b>Sample type</b> | <b>Pt. age</b> | <b>Pt. status</b> | <b>Sub-group</b> | <b><i>EPH</i><br/>A2</b> | <b><i>EPH</i><br/>A3</b> | <b><i>EPH</i><br/>A4</b> | <b><i>EPH</i><br/>A5</b> | <b><i>EPH</i><br/>A7</b> | <b><i>EPH</i><br/>A8</b> | <b><i>EPHA</i><br/>10</b> |
|----------------------------------------------|--------------------|----------------|-------------------|------------------|--------------------------|--------------------------|--------------------------|--------------------------|--------------------------|--------------------------|---------------------------|
| Desmoplastic                                 | Diagnostic         | 1 y            | deceased          | SHH              | ND                       | 325                      | 23                       | 15                       | 227                      | ND                       | ND                        |
| Desmoplastic                                 | Diagnostic         | 2 y            | alive             | SHH              | ND                       | 119                      | 84                       | 7                        | 423                      | ND                       | 32                        |
| Desmoplastic, M+                             | Diagnostic         | 5 y            | alive             | SHH              | ND                       | 25                       | 32                       | 29                       | 264                      | ND                       | ND                        |
| <b>Mean expression desmoplastic SHH:</b>     |                    |                |                   |                  | 0                        | 156                      | 51                       | 17                       | 305                      | 0                        | 32                        |
| <b>% positive desmoplastic SHH:</b>          |                    |                |                   |                  | 0                        | 100                      | 100                      | 100                      | 100                      | 0                        | 33                        |
| MBEN                                         | Diagnostic         | 1 y            | deceased          | SHH              | ND                       | 128                      | 516                      | 63                       | 379                      | 56                       | 18                        |
| Anaplastic                                   | Post-Rx            | 3 y            | deceased          | SHH              | 119                      | 29                       | 45                       | 11                       | 52                       | ND                       | ND                        |
| Classic                                      | Diagnostic         | 9 m            | alive             | SHH              | ND                       | 652                      | 85                       | ND                       | 36                       | ND                       | 24                        |
| Classic                                      | Diagnostic         | 2 y            | deceased          | SHH              | ND                       | 116                      | 23                       | 7                        | 203                      | ND                       | 15                        |
| Classic                                      | Diagnostic         | 2 y            | deceased          | SHH              | ND                       | 177                      | 252                      | 72                       | 520                      | ND                       | 16                        |
| Classic                                      | Diagnostic         | 4 y            | alive             | SHH              | ND                       | 265                      | 16                       | ND                       | 223                      | 27                       | ND                        |
| Classic                                      | Diagnostic         | 5 y            | alive             | SHH              | ND                       | 38                       | 96                       | ND                       | 111                      | 34                       | 32                        |
| Classic, M+                                  | Post-Rx            | 7 y            | deceased          | SHH              | 159                      | 229                      | 21.8                     | 19                       | 72                       | 117                      | ND                        |
| <b>Mean expression non-desmoplastic SHH:</b> |                    |                |                   |                  | 139                      | 204                      | 148                      | 34                       | 199                      | 58                       | 21                        |
| <b>% positive non-desmoplastic SHH:</b>      |                    |                |                   |                  | 25                       | 100                      | 100                      | 63                       | 100                      | 50                       | 63                        |

MB, medulloblastoma; Rx, treatment; Pt. age, patient age at diagnosis; SHH, sonic hedgehog; MBEN, medulloblastoma with extensive nodularity; M+, metastatic; y, years; m, months; ND, not detected

**Online Resource 1c. *EPHB* mRNA Expression,  
SHH vs. Non-SHH MB**

| <b>Tumor histology</b>          | <b>Sample type</b> | <b>Pt. age</b> | <b>Pt. status</b> | <b>Sub-group</b> | <b><i>EPH B1</i></b> | <b><i>EPH B2</i></b> | <b><i>EPH B4</i></b> | <b><i>EPH B6</i></b> |
|---------------------------------|--------------------|----------------|-------------------|------------------|----------------------|----------------------|----------------------|----------------------|
| Desmoplastic                    | Diagnostic         | 1 y            | deceased          | SHH              | 212                  | 95                   | 196                  | ND                   |
| Desmoplastic                    | Diagnostic         | 2 y            | alive             | SHH              | 223                  | 120                  | 111                  | 17                   |
| Desmoplastic, M+                | Diagnostic         | 5 y            | alive             | SHH              | 135                  | 64                   | 201                  | 44                   |
| MBEN                            | Diagnostic         | 1 y            | deceased          | SHH              | 152                  | 73                   | ND                   | 145                  |
| Anaplastic                      | Post-Rx            | 3 y            | deceased          | SHH              | 333                  | 85                   | 289                  | 19                   |
| Classic                         | Diagnostic         | 9 m            | alive             | SHH              | 176                  | 133                  | 164                  | 27                   |
| Classic,                        | Diagnostic         | 2 y            | deceased          | SHH              | 334                  | 121                  | 143                  | 36                   |
| Classic                         | Post-Rx            | 2 y            | deceased          | SHH              | 640                  | 138                  | 114                  | 14                   |
| Classic                         | Diagnostic         | 4 y            | alive             | SHH              | 95                   | 60                   | 211                  | 112                  |
| Classic                         | Diagnostic         | 5 y            | alive             | SHH              | ND                   | 70                   | 380                  | 46                   |
| Classic, M+                     | Post-Rx            | 7              | deceased          | SHH              | 157                  | 71                   | 247                  | 135                  |
| <b>Mean expression SHH:</b>     |                    |                |                   |                  | 246                  | 94                   | 206                  | 59                   |
| <b>% positive SHH:</b>          |                    |                |                   |                  | 91                   | 100                  | 91                   | 91                   |
| Anaplastic                      | Diagnostic         | 3 y            | alive             | 3                | 478                  | 70                   | ND                   | 95                   |
| Anaplastic                      | Diagnostic         | 2 y            | alive             | 4                | 110                  | 72                   | ND                   | 67                   |
| Anaplastic                      | Diagnostic         | 6 y            | alive             | 4                | 274                  | 76                   | ND                   | 49                   |
| Classic                         | Diagnostic         | 6 m            | alive             | 4                | ND                   | 215                  | 167                  | 167                  |
| Classic                         | Diagnostic         | 1 y            | alive             | 3                | 201                  | 115                  | ND                   | 407                  |
| Classic                         | Diagnostic         | 2 y            | alive             | 4                | 121                  | 103                  | ND                   | 116                  |
| Classic                         | Diagnostic         | 2 y            | alive             | 3                | 877                  | 128                  | ND                   | 136                  |
| Classic, M+                     | Diagnostic         | 2 y            | alive             | 3                | 29                   | 165                  | ND                   | 475                  |
| Classic                         | Diagnostic         | 3 y            | alive             | 4                | 194                  | 93                   | ND                   | 107                  |
| Classic, M+                     | Diagnostic         | 5 y            | deceased          | 3                | 239                  | 159                  | ND                   | 53                   |
| Classic, M+                     | Diagnostic         | 6 y            | deceased          | 4                | 474                  | 150                  | ND                   | 393                  |
| Classic                         | Diagnostic         | 6 y            | alive             | 4                | 407                  | 192                  | ND                   | 51                   |
| Classic, M+                     | Diagnostic         | 8 y            | deceased          | 4                | 354                  | 144                  | ND                   | 172                  |
| Classic                         | Diagnostic         | 11 y           | alive             | 3                | 79                   | 89                   | ND                   | 500                  |
| Classic                         | Diagnostic         | 11 y           | alive             | 4                | 563                  | 104                  | ND                   | 102                  |
| Classic                         | Diagnostic         | 11 y           | alive             | 3                | 1137                 | 143                  | ND                   | 111                  |
| Classic                         | Diagnostic         | 12 y           | alive             | 4                | 46                   | 187                  | ND                   | 49                   |
| Classic                         | Diagnostic         | 16 y           | alive             | 4                | 54                   | 49                   | ND                   | 17                   |
| <b>Mean expression non-SHH:</b> |                    |                |                   |                  | 331                  | 125                  | 167                  | 170                  |
| <b>% positive non-SHH:</b>      |                    |                |                   |                  | 94                   | 100                  | 5                    | 100                  |
| <b>Overall mean expression:</b> |                    |                |                   |                  | 300                  | 113                  | 202                  | 130                  |
| <b>Overall % positive:</b>      |                    |                |                   |                  | 93                   | 100                  | 38                   | 97                   |
|                                 |                    |                |                   |                  |                      |                      |                      |                      |

**Online Resource 1d. *EPHB* mRNA Expression,  
Desmoplastic vs. Non-Desmoplastic SHH MB**

| <b>Tumor histology</b>                       | <b>Sample type</b> | <b>Pt. age</b> | <b>Pt. status</b> | <b>Sub-group</b> | <b><i>EPH B1</i></b> | <b><i>EPH B2</i></b> | <b><i>EPH B4</i></b> | <b><i>EPHB 6</i></b> |
|----------------------------------------------|--------------------|----------------|-------------------|------------------|----------------------|----------------------|----------------------|----------------------|
| Desmoplastic                                 | Diagnostic         | 1 y            | deceased          | SHH              | 212                  | 95                   | 196                  | ND                   |
| Desmoplastic                                 | Diagnostic         | 2 y            | alive             | SHH              | 223                  | 120                  | 111                  | 17                   |
| Desmoplastic, M+                             | Diagnostic         | 5 y            | alive             | SHH              | 135                  | 64                   | 201                  | 44                   |
| <b>Mean expression desmoplastic SHH:</b>     |                    |                |                   |                  | 190                  | 93                   | 169                  | 30                   |
| <b>% positive desmoplastic SHH:</b>          |                    |                |                   |                  | 100                  | 100                  | 100                  | 67                   |
| MBEN                                         | Diagnostic         | 1 y            | deceased          | SHH              | 152                  | 73                   | ND                   | 145                  |
| Anaplastic                                   | Post-Rx            | 3 y            | deceased          | SHH              | 333                  | 85                   | 289                  | 19                   |
| Classic                                      | Diagnostic         | 9 m            | alive             | SHH              | 176                  | 133                  | 164                  | 27                   |
| Classic                                      | Diagnostic         | 2 y            | deceased          | SHH              | 334                  | 121                  | 143                  | 36                   |
| Classic                                      | Diagnostic         | 2 y            | deceased          | SHH              | 640                  | 138                  | 114                  | 14                   |
| Classic                                      | Diagnostic         | 4 y            | alive             | SHH              | 95                   | 60                   | 211                  | 112                  |
| Classic                                      | Diagnostic         | 5 y            | alive             | SHH              | ND                   | 70                   | 380                  | 46                   |
| Classic, M+                                  | Post-Rx            | 7 y            | deceased          | SHH              | 152                  | 73                   | ND                   | 145                  |
| <b>Mean expression non-desmoplastic SHH:</b> |                    |                |                   |                  | 269                  | 94                   | 221                  | 67                   |
| <b>% positive non-desmoplastic SHH:</b>      |                    |                |                   |                  | 87                   | 100                  | 75                   | 100                  |

MB, medulloblastoma; Rx, treatment; Pt. age, patient age at diagnosis; SHH, sonic hedgehog; MBEN, medulloblastoma with extensive nodularity; M+, metastatic; y, years; m, months; ND, not detected

**Online Resource 1e. *EFNA*, *EFNB* mRNA Expression,  
SHH vs. Non-SHH MB**

| <b>Tumor histology</b>          | <b>Sample type</b> | <b>Pt. age</b> | <b>Pt. status</b> | <b>Sub-group</b> | <b><i>EFN A1</i></b> | <b><i>EFN A3</i></b> | <b><i>EFN A4</i></b> | <b><i>EFN A5</i></b> | <b><i>EFN B1</i></b> | <b><i>EFN B2</i></b> | <b><i>EFN B3</i></b> |
|---------------------------------|--------------------|----------------|-------------------|------------------|----------------------|----------------------|----------------------|----------------------|----------------------|----------------------|----------------------|
| Desmoplastic                    | Diagnostic         | 1 y            | deceased          | SHH              | ND                   | ND                   | 39                   | 297                  | ND                   | 489                  | 222                  |
| Desmoplastic                    | Diagnostic         | 2 y            | alive             | SHH              | ND                   | 51                   | 31                   | 395                  | ND                   | 861                  | 357                  |
| Desmoplastic, M+                | Diagnostic         | 5 y            | alive             | SHH              | 53                   | ND                   | 92                   | 388                  | ND                   | 1029                 | 192                  |
| MBEN                            | Diagnostic         | 1 y            | deceased          | SHH              | ND                   | ND                   | 62                   | 502                  | 30                   | 381                  | 425                  |
| Anaplastic                      | Post-Rx            | 3 y            | deceased          | SHH              | ND                   | 63                   | 125                  | 319                  | 38                   | 1021                 | 418                  |
| Classic                         | Diagnostic         | 9 m            | alive             | SHH              | ND                   | ND                   | 75                   | 295                  | ND                   | 400                  | 570                  |
| Classic,                        | Diagnostic         | 2 y            | deceased          | SHH              | 103                  | ND                   | 31                   | 400                  | ND                   | 669                  | 286                  |
| Classic                         | Post-Rx            | 2 y            | deceased          | SHH              | ND                   | ND                   | 27                   | 862                  | ND                   | 598                  | 192                  |
| Classic                         | Diagnostic         | 4 y            | alive             | SHH              | 127                  | ND                   | 83                   | 389                  | 32                   | 724                  | 441                  |
| Classic                         | Diagnostic         | 5 y            | alive             | SHH              | ND                   | ND                   | ND                   | 193                  | ND                   | 317                  | 309                  |
| Classic, M+                     | Post-Rx            | 7 y            | deceased          | SHH              | 273                  | ND                   | ND                   | 217                  | ND                   | 581                  | 454                  |
| <b>Mean expression SHH:</b>     |                    |                |                   |                  | 139                  | 57                   | 63                   | 387                  | 33                   | 643                  | 351                  |
| <b>% positive SHH:</b>          |                    |                |                   |                  | 36                   | 18                   | 82                   | 100                  | 27                   | 100                  | 100                  |
| Anaplastic                      | Diagnostic         | 3 y            | alive             | 3                | 124                  | 63                   | ND                   | 161                  | ND                   | 283                  | 824                  |
| Anaplastic                      | Diagnostic         | 2 y            | alive             | 4                | ND                   | ND                   | ND                   | 42                   | ND                   | 166                  | 339                  |
| Anaplastic                      | Diagnostic         | 6 y            | alive             | 4                | 120                  | ND                   | ND                   | 627                  | ND                   | 196                  | 1002                 |
| Classic                         | Diagnostic         | 6 m            | alive             | 4                | 667                  | 192                  | ND                   | 902                  | ND                   | 1101                 | ND                   |
| Classic                         | Diagnostic         | 1 y            | alive             | 3                | 201                  | 63                   | ND                   | 144                  | ND                   | 213                  | 1547                 |
| Classic                         | Diagnostic         | 2 y            | alive             | 4                | 515                  | 56                   | ND                   | 42                   | ND                   | 325                  | 511                  |
| Classic                         | Diagnostic         | 2 y            | alive             | 3                | 139                  | 74                   | ND                   | 589                  | ND                   | 206                  | 955                  |
| Classic, M+                     | Diagnostic         | 2 y            | alive             | 3                | 153                  | ND                   | 30                   | 656                  | ND                   | 1167                 | 244                  |
| Classic                         | Diagnostic         | 3 y            | alive             | 4                | 175                  | 73                   | ND                   | 359                  | 23                   | 126                  | 842                  |
| Classic, M+                     | Diagnostic         | 5 y            | deceased          | 3                | 285                  | ND                   | ND                   | 172                  | ND                   | 237                  | 303                  |
| Classic, M+                     | Diagnostic         | 6 y            | deceased          | 4                | 226                  | 95                   | ND                   | 248                  | 44                   | 201                  | 804                  |
| Classic                         | Diagnostic         | 6 y            | alive             | 4                | ND                   | 41                   | ND                   | 59                   | ND                   | 153                  | 557                  |
| Classic, M+                     | Diagnostic         | 8 y            | deceased          | 4                | ND                   | 52                   | ND                   | 128                  | 45                   | 508                  | 454                  |
| Classic                         | Diagnostic         | 11 y           | alive             | 3                | ND                   | ND                   | ND                   | 84                   | ND                   | 283                  | 562                  |
| Classic                         | Diagnostic         | 11 y           | alive             | 4                | 343                  | 154                  | ND                   | 63                   | 34                   | 272                  | 1187                 |
| Classic                         | Diagnostic         | 11 y           | alive             | 3                | 80                   | 65                   | ND                   | 64                   | ND                   | 238                  | 293                  |
| Classic                         | Diagnostic         | 12 y           | alive             | 4                | ND                   | ND                   | ND                   | 168                  | 29                   | 99                   | 497                  |
| Classic                         | Diagnostic         | 16 y           | alive             | 4                | 90                   | ND                   | ND                   | 334                  | ND                   | 185                  | ND                   |
| <b>Mean expression non-SHH:</b> |                    |                |                   |                  | 240                  | 84                   | 30                   | 269                  | 35                   | 331                  | 682                  |
| <b>% positive non-SHH:</b>      |                    |                |                   |                  | 72                   | 61                   | 5                    | 100                  | 28                   | 100                  | 89                   |
| <b>Overall mean expression:</b> |                    |                |                   |                  | 216                  | 80                   | 60                   | 314                  | 34                   | 449                  | 547                  |
| <b>Overall % positive:</b>      |                    |                |                   |                  | 59                   | 45                   | 34                   | 100                  | 28                   | 100                  | 93                   |

**Online Resource 1f. *EFNA*, *EFNB* mRNA Expression,  
Desmoplastic vs. Non-Desmoplastic SHH MB**

| <b>Tumor histology</b>                       | <b>Sample type</b> | <b>Pt. age</b> | <b>Pt. status</b> | <b>Sub-group</b> | <b><i>EFN</i><br/><i>A1</i></b> | <b><i>EFN</i><br/><i>A3</i></b> | <b><i>EFN</i><br/><i>A4</i></b> | <b><i>EFN</i><br/><i>A5</i></b> | <b><i>EFN</i><br/><i>B1</i></b> | <b><i>EFN</i><br/><i>B2</i></b> | <b><i>EFN</i><br/><i>B3</i></b> |
|----------------------------------------------|--------------------|----------------|-------------------|------------------|---------------------------------|---------------------------------|---------------------------------|---------------------------------|---------------------------------|---------------------------------|---------------------------------|
| Desmoplastic                                 | Diagnostic         | 1 y            | deceased          | SHH              | ND                              | ND                              | 39                              | 297                             | ND                              | 489                             | 222                             |
| Desmoplastic                                 | Diagnostic         | 2 y            | alive             | SHH              | ND                              | 51                              | 31                              | 395                             | ND                              | 861                             | 357                             |
| Desmoplastic, M+                             | Diagnostic         | 5 y            | alive             | SHH              | 53                              | ND                              | 92                              | 388                             | ND                              | 1029                            | 192                             |
| <b>Mean expression desmoplastic SHH:</b>     |                    |                |                   |                  | 53                              | 51                              | 54                              | 360                             | 0                               | 793                             | 257                             |
| <b>% positive desmoplastic SHH:</b>          |                    |                |                   |                  | 33                              | 33                              | 100                             | 100                             | 0                               | 100                             | 100                             |
| MBEN                                         | Diagnostic         | 1 y            | deceased          | SHH              | ND                              | ND                              | 62                              | 502                             | 30                              | 381                             | 425                             |
| Anaplastic                                   | Post-Rx            | 3 y            | deceased          | SHH              | ND                              | 63                              | 125                             | 319                             | 38                              | 1021                            | 418                             |
| Classic                                      | Diagnostic         | 9 m            | alive             | SHH              | ND                              | ND                              | 75                              | 295                             | ND                              | 400                             | 570                             |
| Classic                                      | Diagnostic         | 2 y            | deceased          | SHH              | 103                             | ND                              | 31                              | 400                             | ND                              | 669                             | 286                             |
| Classic                                      | Diagnostic         | 2 y            | deceased          | SHH              | ND                              | ND                              | 27                              | 862                             | ND                              | 598                             | 192                             |
| Classic                                      | Diagnostic         | 4 y            | alive             | SHH              | 127                             | ND                              | 83                              | 389                             | 32                              | 724                             | 441                             |
| Classic                                      | Diagnostic         | 5 y            | alive             | SHH              | ND                              | ND                              | ND                              | 193                             | ND                              | 317                             | 309                             |
| Classic, M+                                  | Post-Rx            | 7 y            | deceased          | SHH              | 273                             | ND                              | ND                              | 217                             | ND                              | 581                             | 454                             |
| <b>Mean expression non-desmoplastic SHH:</b> |                    |                |                   |                  | 168                             | 63                              | 67                              | 397                             | 33                              | 586                             | 387                             |
| <b>% positive non-desmoplastic SHH:</b>      |                    |                |                   |                  | 37                              | 12                              | 75                              | 100                             | 37                              | 100                             | 100                             |

MB, medulloblastoma; Rx, treatment; Pt. age, patient age at diagnosis; SHH, sonic hedgehog; MBEN, medulloblastoma with extensive nodularity; M+, metastatic; y, years; m, months; ND, not detected

**EphrinB1 expression is dysregulated and promotes oncogenic signaling in medulloblastoma**

Journal of Neuro-Oncology

Nicole McKinney, Liangping Yuan, Hongying Zhang, Jingbo Liu, Yoon-Jae Cho,

Elisabeth Rushing, Matthew Schniederjan and Tobey J. MacDonald\*

\*Corresponding author: Emory University School of Medicine, Aflac Cancer and Blood

Disorders Center, Children's Healthcare of Atlanta, Email: [tobey.macdonald@emory.edu](mailto:tobey.macdonald@emory.edu)
